# Supplementary material for: Clinical and genetic spectrum of glycogen storage disease in Iranian population using targeted gene sequencing
Source: PubMed Central journal article supplement (PMC8007705; doi:10.1038/s41598-021-86338-4), 2021-03-29
Supplement: 41598_2021_86338_MOESM1_ESM.pdf [file 41598_2021_86338_MOESM1_ESM.pdf]

Clinical and Genetic Spectrum of Glycogen Storage Disease in Iranian Population using Targeted  
Gene Sequencing

Zahra Beyzaei PhD <sup>1</sup>, Fatih Ezgu MD <sup>2</sup>, Bita Geramizadeh MD<sup>1,3\*</sup>, Mohammad Hadi Imanieh MD<sup>4</sup>, Mahmoud Haghghat MD<sup>4</sup>, Seyed Mohsen Dehghani MD<sup>4</sup>, Naser Honar MD<sup>4</sup>, Mojgan Zahmatkeshan MD<sup>4,5</sup>, Amirreza Jassbi PhD <sup>6</sup>, Marjan Mahboubifar PhD<sup>6</sup>, Alireza Alborzi MPH<sup>7</sup>

<sup>1</sup>Shiraz Transplant Research Center (STRC), Shiraz University of Medical Sciences, Shiraz, Iran.

<sup>2</sup>Department of Pediatric Metabolic Disorders and Pediatric Genetics, Gazi University Faculty of Medicine, Ankara, Turkey.

<sup>3</sup>Department of Pathology, Shiraz University of Medical Sciences, Shiraz, Iran.

<sup>4</sup>Gastroenterology and Hepatology Research Center, Shiraz University of Medical Sciences, Shiraz, Iran.

<sup>5</sup>Department of Pediatrics, Shiraz University of Medical Sciences, Shiraz, Iran.

<sup>6</sup>Medicinal and Natural Products Chemistry Research Center, Shiraz University of Medical Sciences, Shiraz, Iran.

<sup>7</sup>Student Research Committee, Shiraz University of Medical Sciences, Shiraz, Iran.

\*Corresponding Author: Bita Geramizadeh, Professor of Pathology, Department of Pathology, Shiraz University of Medical Sciences, Shiraz, Iran. Postal Address: Khalili St., Research Tower, Seventh Floor, Shiraz Transplant Research Center (STRC), Shiraz, Iran. Call number: 98-71-36472915, E-mail address: [geramib@gmail.com](mailto:geramib@gmail.com)

Table S1. Confirming Variants in Next-Generation Sequencing Panel Testing by Sanger Sequencing

| GSD Types                    | Genes          | Transcript     | GRCh37 location | Exon/Intron | cDNA location | Strand | NGS result | Sanger result |
|------------------------------|----------------|----------------|-----------------|-------------|---------------|--------|------------|---------------|
| GSD Ib                       | <i>SLC37A4</i> | NM_001164279.2 | chr11:118900056 | Exon8       | c.24          | -      | T>G        | T>G           |
| GSD Ib                       | <i>SLC37A4</i> | NM_001164279.2 | chr11:118898407 | Exon6       | c.337         | -      | C>T        | C>T           |
| GSD III                      | <i>AGL</i>     | NM_000642.3    | chr1:100336041  | Exon6       | c.753_756     | +      | delCAGA    | delCAGA       |
| GSD III                      | <i>AGL</i>     | NM_000642.3    | chr1:100336041  | Exon6       | c.753_756     | +      | delCAGA    | delCAGA       |
| GSD III                      | <i>AGL</i>     | NM_000642.3    | chr1:100342081  | Exon11      | c.1351_1355   | +      | delAAAGC   | delAAAGC      |
| GSD III                      | <i>AGL</i>     | NM_000642.3    | chr1:100379113  | Exon30      | c.3980        | +      | G>A        | G>A           |
| GSD IV                       | <i>GBE1</i>    | NM_000158.4    | chr3:81643169   | Exon8       | c.998         | -      | A>T        | A>T           |
| GSD IV                       | <i>GBE1</i>    | NM_000158.4    | chr3:81754616   | Exon2       | c.292         | -      | G>C        | G>C           |
| GSD VI                       | <i>PYGL</i>    | NM_002863.5    | chr14:51378453  | Exon16      | c.1964        | -      | A>G        | A>G           |
| GSD VI                       | <i>PYGL</i>    | NM_002863.5    | chr14:51410891  | Exon1       | c.229_231     | -      | delGAC     | delGAC        |
| GSD IXc                      | <i>PHKG2</i>   | NM_000294.2    | chr16:30762461  | Exon3       | c.130         | +      | C>T        | C>T           |
| GSD IXb                      | <i>PHKB</i>    | NM_000293.3    | chr16:47531367  | Exon2       | c.134         | +      | T>A        | T>A           |
| GSD IXb                      | <i>PHKB</i>    | NM_000293.3    | chr16:47628046  | Exon11      | c.1127-2      | +      | A>G        | A>G           |
| GSD IXb                      | <i>PHKB</i>    | NM_000293.3    | chr16:47727384  | Exon28      | c.2840        | +      | A>G        | A>G           |
| GSD X                        | <i>PGAM2</i>   | NM_000290.4    | chr7:44105115   | Exon1       | c.14          | -      | G>A        | G>A           |
| GSD heart, lethal congenital | <i>PRKAG2</i>  | NM_001040633.1 | chr7:151329185  | Exon5       | c.592         | -      | A>T        | A>T           |
